# Supplementary material
Source: Springer Nature journal article supplement (https://www.springermedizin.de/resource/supplementary/13012_2013_775_MOESM2_ESM.pdf/9630670)
Supplement: MOESM2 [file 9630670]

**Additional file 2: Top ten KT skills**

| Area          | KT Skills                                                                 | Top ten ranking | % Interested in learning more | % Research Producer <sup>a</sup> interest | % Research User <sup>b</sup> interest |
|---------------|---------------------------------------------------------------------------|-----------------|-------------------------------|-------------------------------------------|---------------------------------------|
| General KT    | Developing a KT plan                                                      |                 | 84.4                          |                                           |                                       |
|               | Implementing a KT plan                                                    | 10              | 85.2                          |                                           |                                       |
|               | Evaluating a KT plan                                                      |                 | 83.0                          |                                           |                                       |
|               | KT models and theories                                                    |                 | 81.5                          |                                           |                                       |
|               | KT research                                                               |                 | 79.0                          |                                           |                                       |
|               | Teaching KT                                                               |                 | 57.8                          |                                           |                                       |
| Dissemination | Developing a dissemination plan                                           |                 | 83.1                          |                                           |                                       |
|               | Implementing a dissemination plan                                         |                 | 84.7                          |                                           |                                       |
|               | Evaluating a dissemination plan                                           |                 | 83.1                          |                                           |                                       |
|               | Developing key messages                                                   | 8               | 85.4                          |                                           |                                       |
|               | Communicating using plain language                                        | 4               | 87.4                          |                                           |                                       |
|               | Targeting communication to specific audiences                             | 3               | 87.8                          |                                           |                                       |
|               | Social marketing                                                          |                 | 75.2                          |                                           |                                       |
|               | Working with the media                                                    |                 | 67.8                          |                                           |                                       |
| Synthesis     | Conducting evidence syntheses                                             |                 | 69.9                          |                                           |                                       |
|               | Communicating evidence syntheses                                          |                 | 75.4                          |                                           |                                       |
|               | Finding and appraising evidence syntheses                                 |                 | 70.7                          |                                           |                                       |
| Exchange      | Working with decision-makers                                              | 2               | 88.7                          |                                           |                                       |
|               | Working with researchers                                                  |                 | 81.5                          |                                           |                                       |
|               | Working with industry                                                     |                 | 68.0                          |                                           |                                       |
|               | How decisions are made in health care environments                        | 1               | 89.2                          |                                           |                                       |
|               | How decisions are made in government environments                         |                 | 83.9                          |                                           |                                       |
|               | Using social media or web-based tools for knowledge exchange              |                 | 82.7                          |                                           |                                       |
| Application   | Developing evidence-informed practices and programs                       | 5               | 86.7                          |                                           |                                       |
|               | Implementing evidence-informed practices and programs                     | 6               | 86.7                          |                                           |                                       |
|               | Sustaining evidence-informed practices and programs                       | 7               | 86.4                          |                                           |                                       |
|               | Evaluating the implementation of evidence-informed practices and programs | 9               | 85.3                          |                                           |                                       |

|  |                                                             |  |      |  |  |
|--|-------------------------------------------------------------|--|------|--|--|
|  | KT related to the commercialization of products or services |  | 57.5 |  |  |
|--|-------------------------------------------------------------|--|------|--|--|

<sup>a</sup> Includes researchers, clinician-scientists and research trainees

<sup>b</sup> Includes health care providers and administrators, and public servants. For analysis on levels of interest, knowledge brokers were considered separately because of consistently high interest.

-  80% interest and over
-  70 – 79% interest
-  Below 70%
-  Varying results
